# Supplementary material for: Rapid NMR screening of chloride receptors: uncovering catechol as a useful anion binding motifElectronic supplemenary information (ESI) available: calibration graphs for the binding process between receptor 1 and chloride, and a worked example illustrating the use of this calibrated competitive method to determine the binding constant between receptor 15 and chloride. See http://www.rsc.org/suppdata/ob/b3/b310455a/
Source: Royal Society of Chemistry journal article supplement (doi:10.1039/b310455a), 2003-01-01
Supplement: b310455a.doc [file b310455a.doc]

**Electronic Supplementary Information – David K. Smith**

**Generating Calibration Graphs for Receptor 1 Binding Chloride Anions**

Given that the binding constant (*K*ref) for the equilibrium between reference receptor (Rref) and substrate (S) can be defined as:

*K*ref = [Rref.S]/[Rref]free[S]free (1)

and the unbound (free) concentrations of receptor ([Rref]free) and substrate ([S]free) in solution can be defined as:

[Rref]free = [Rref]total – [Rref.S] (2)

[S]free = [S]total – [Rref.S] (3)

The concentration of complex [Rref.S] can be defined as:

a[Rref.S]2 + b[Rref.S] + c = 0 (4)

where:

a = *K*ref (5)

b = -(*K*ref[S]total + *K*ref[Rref]total + 1) (6)

c = *K*ref[Rref]total[S]total (7)

By using the value of *K*ref from the NMR titration (in this case 31 M-1), and the known values of [S]total and [Rref]total at each point in the calibration titration, a, b and c can be calculated, and the quadratic equation (4) can be solved for [Rref.S] at each point in the titration. Straight line relationships between the NMR shift of the observed protons and [Rref.S] can then be generated (Figs. 1a and 1b).

Figure 1a – Calibration graph for compound **1** (Rref) being perturbed by chloride anions (S). The graph relates the NMR shift of the N-H proton and [Rref.S].

Figure 1b – Calibration graph for compound **1** (Rref) being perturbed by chloride anions (S). The graph relates the NMR shift of the Ar-H proton and [Rref.S].

**Monitoring Competition for Chloride Anions Between Compound 1 and a Receptors of Interest**

The binding constant (*K*unk) for the receptor of interest (Runk) can be defined as:

*K*unk = [Runk.S]/[Runk]free[S]free (8)

In order to determine *K*unk, we therefore need to express [Runk.S], [Runk]free and [S]free in terms of known quantities. This can be done using equations 9-11.

[S]free = [Rref.S]/*K*ref([Rref]total – [Rref.S]) (9)

[Runk.S] = [S]total – [S]free – [Rref.S] (10)

[Runk]free = [Runk]total – [Runk.S] (11)

In equation 9: *K*ref is known from the calibration of receptor **1**, [Rref]total is a known concentration, and [Rref.S] can be determined by using the NMR shifts of the N-H and Ar-H protons in the competition mixture with the calibration curves (Figs. 1a and 1b). Hence [S]free is determined.

In equation 10: [S]total is a known concentration, [S]free was calculated using equation 9, and [Rref.S] was derived from the calibration curve. Hence [Runk.S] is determined.

In equation 11: [Runk]total is a known concentration, and [Runk.S] was derived from the calibration curve. Hence [Runk]free is determined.

Substituting these three values into equation (8) allows us to estimate the binding constant for the receptor of interest, *K*unk.

The derivation of binding constants from actual experimental data will be illustrated for the competition for chloride anions between catechol **15** and receptor **1**.

[**1**] = 3.67 mM, [Cl-] = 3.57 mM, [**15**] = 5.66 mM

NMR shift of N-H proton in competition experiment = 8.3664 ppm

Using the calibration equation shown on Fig. 1a:

[Rref.S] = (8.3664-8.293)/853.99

[Rref.S] = 0.086 mM

Using equation (9)

[S]free = 0.000086/31(0.00367-0.000086)

[S]free = 0.774 mM

Using equation (10)

[Runk.S] = 3.57 – 0.086 – 0.774

[Runk.S] = 2.71 mM

Using equation (11)

[Runk]free = 5.66 – 2.71

[Runk]free = 2.95 mM

Therefore *K*unk = 0.00271/(0.00295x0.000774)

*K*unk = 1187 mol-1dm3

This fitting process is repeated for Ar-H. Further single spectrum competition experiment(s) are made in order to generate average *K*app values (this is necessary to remove errors in measurement). These are the values reported in Table 1 (see paper).

Note – this method requires no non-linear least squares fitting and generates approximate binding constants using ‘pencil and paper’. A simple spreadsheet can be created to calculate *K*app values.
